# Supplementary material for: Nedd8 hydrolysis by UCH proteases in Plasmodium parasites
Source: PubMed Central journal article supplement (PMC6837540; doi:10.1371/journal.ppat.1008086), 2019-10-28

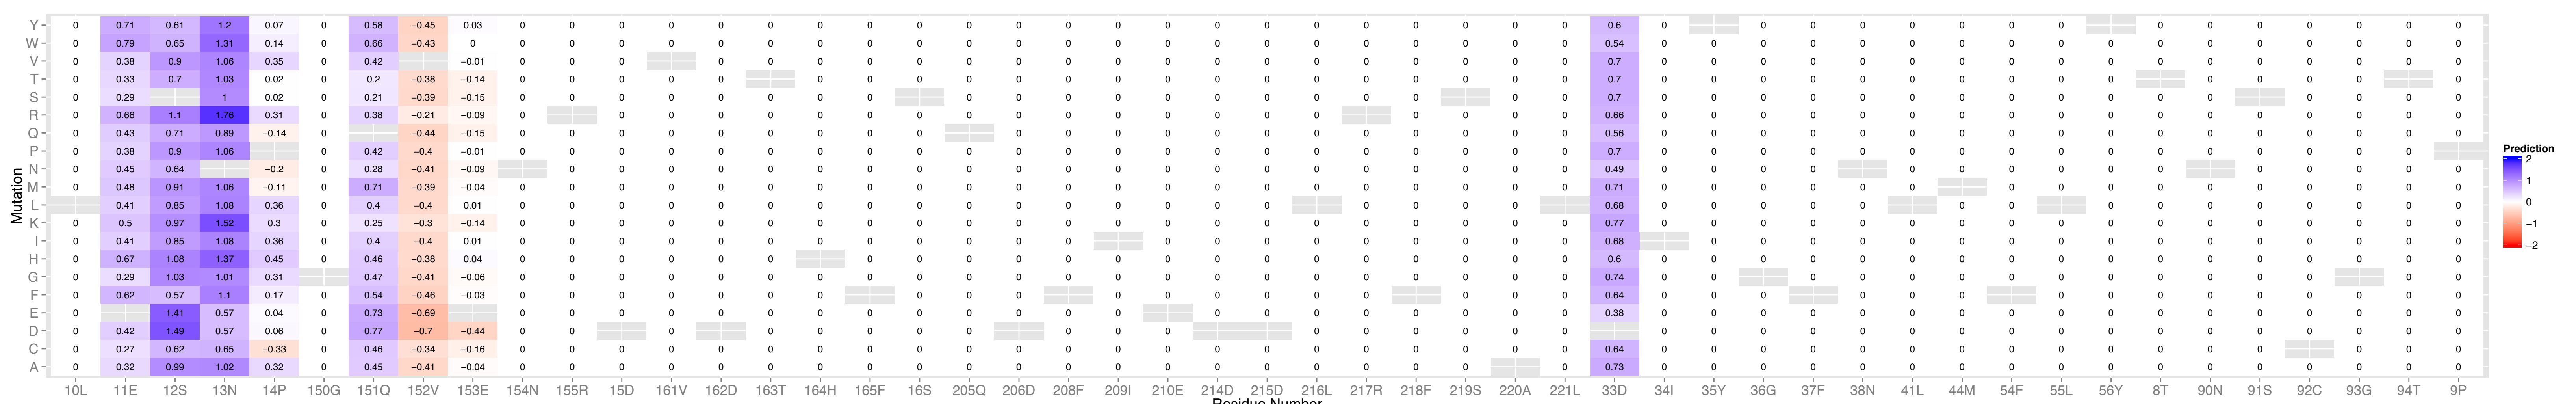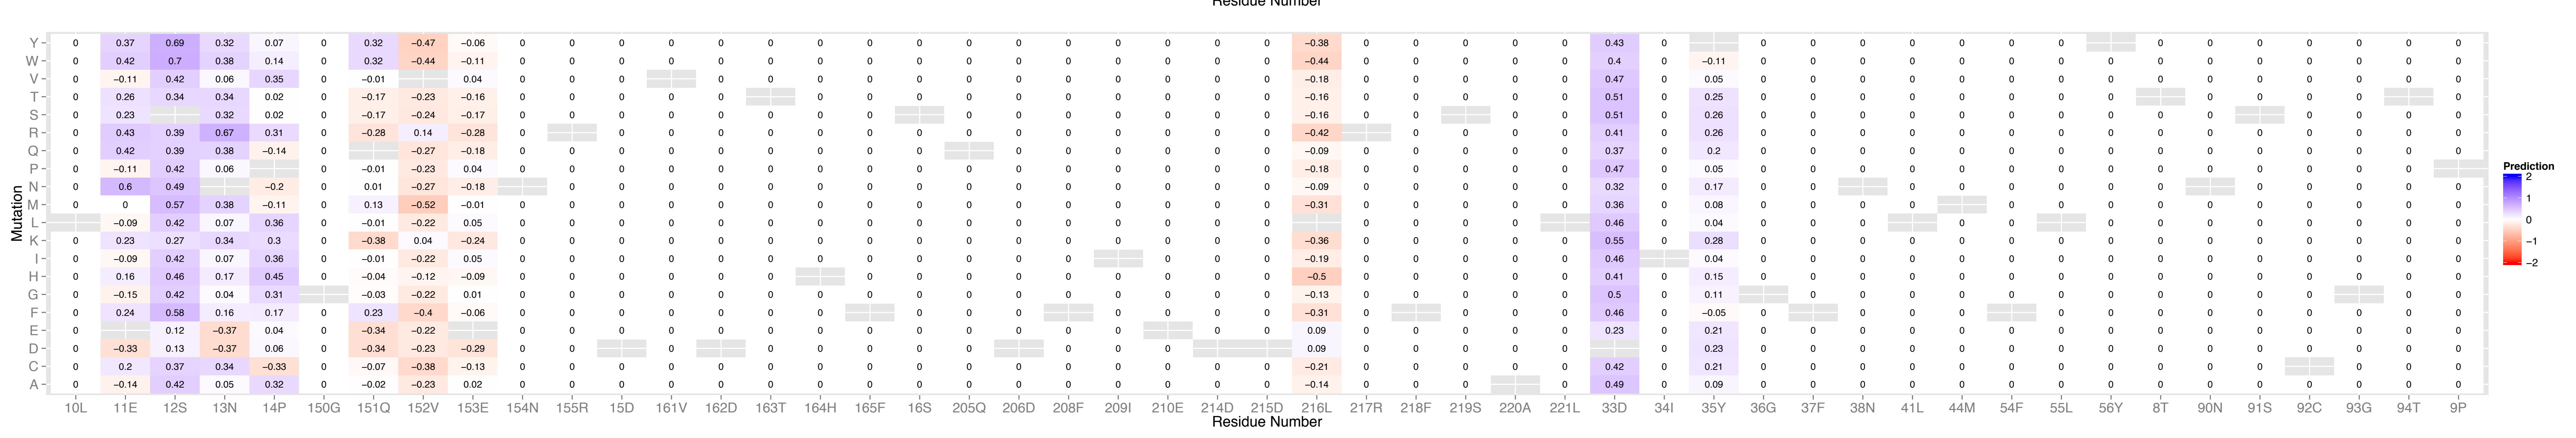

Supplement: ppat.1008086.s003.pdf [file ppat.1008086.s003.pdf]
