# Supplementary material for: Nedd8 hydrolysis by UCH proteases in Plasmodium parasites
Source: PubMed Central journal article supplement (PMC6837540; doi:10.1371/journal.ppat.1008086), 2019-10-28

## Supp Figure 2

A

|                |                                                                                   |            |
|----------------|-----------------------------------------------------------------------------------|------------|
| <b>HsUCH37</b> | MTGNA----GEWCLMESDPGVFTELIKFGCRGAQVEE IWSLE-----                                  | <b>39</b>  |
| <b>PfUCH37</b> | MARDNENILEEWCLIESNPCIFYDMLKRMGATEISVEDVYSLSYFDDYINNKEIINMNI                       | <b>60</b>  |
| <b>HsUCH37</b> | -----PENFEKLP----VHGLIFLFKWQPGE                                                   | <b>62</b>  |
| <b>PfUCH37</b> | LGVDTYLGENNKTLDKENNVVDVIELYKNNICMEDKYNKLLKHHSYIYGIIFLFNIGKHY                      | <b>120</b> |
| <b>HsUCH37</b> | EPAGSVVQDSRLDTIFFAKQVINNA <b>C</b> ATQAIVSVLLNCTHQDVHLGETLSEFKEFSSQSF             | <b>122</b> |
| <b>PfUCH37</b> | K--NNKYIEHNVPDNLFFAKQVIPNA <b>C</b> ATQAILSIVLN---KDIELNDEIKNIKTFSLNFD            | <b>176</b> |
| <b>HsUCH37</b> | AAMKGLALSNSDVIRQVHNSFARQQMFEDT--KTSAKEEDAF <b>H</b> FVSYVPVNGRLYEL <b>DG</b>      | <b>180</b> |
| <b>PfUCH37</b> | SSMKGLTLSNCTFLRNIHNSYKPPYLDKEDVHHDKKKSEDS <b>F</b> HVSYISFQDKVYLL <b>DG</b>       | <b>236</b> |
| <b>HsUCH37</b> | LREGPIDLGACNQD-----                                                               | <b>194</b> |
| <b>PfUCH37</b> | LQSGPVLINADEQ <b>NKPNPNNNNNNKDNNDN</b> NNNNNNNNNNNNNNNNNNNNNNNNNNNNNNI <b>GMN</b> | <b>296</b> |
| <b>HsUCH37</b> | --DWISAVRPVIEKRIQY----SEGEIRFNLMAIVSDRKMIEYQKIA-----                              | <b>236</b> |
| <b>PfUCH37</b> | GKDWIEISREHIKKEIDEICNSQTNNDVRFNIIAVMKDKEYIIQEYINIHRIVKQRVNIK                      | <b>356</b> |
| <b>HsUCH37</b> | -----ELQRQLAEEE-----PMDTDQGSMLSIAIQSEVAKNQMLIEEEV                                 | <b>275</b> |
| <b>PfUCH37</b> | LINLGENIELSDEINEDEFLLNDIPS IENLPNNVDTLYNIVNKSTLEINYLQSLLEHQK                      | <b>416</b> |
| <b>HsUCH37</b> | QKLKRYKIENIRRKHNYLPFIMELLKTLAEHQQLIPLVEKAKEKQNAKKAQETK                            | <b>329</b> |
| <b>PfUCH37</b> | EIKKLWNKELTFKFFNFYPFIMSSLNLMAKHK----LLKDAYQKEKLNATKS-                             | <b>465</b> |

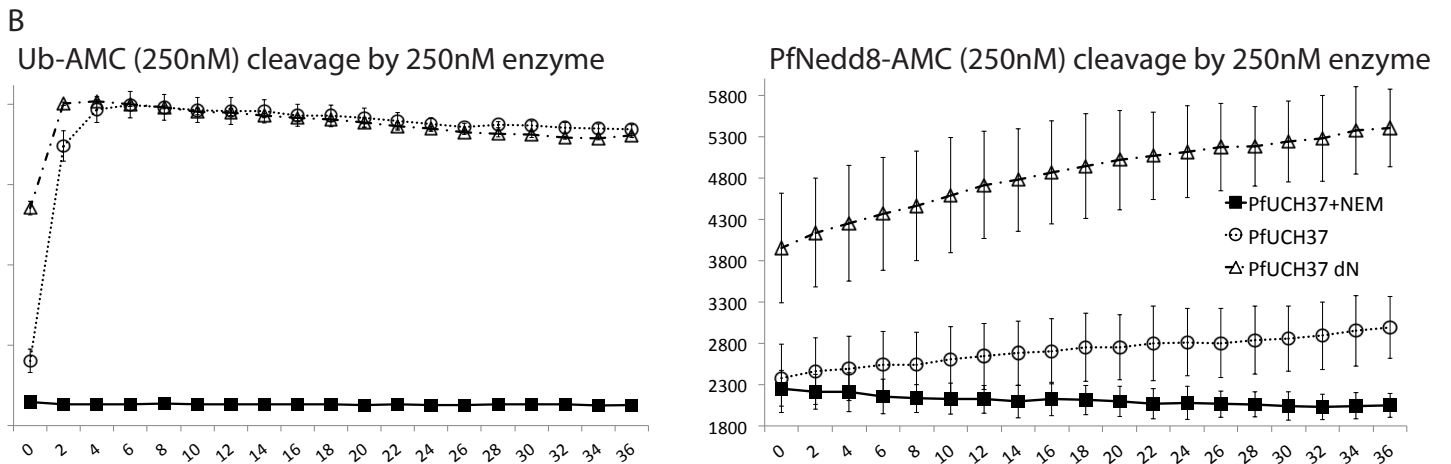

Supplement: ppat.1008086.s005.pdf [file ppat.1008086.s005.pdf]
